# Supplementary material for: Can crayfish take the heat? Procambarus clarkii show nociceptive behaviour to high temperature stimuli, but not low temperature or chemical stimuli
Source: PubMed Central journal article supplement (PMC4400587; doi:10.1242/bio.20149654), 2015-03-27
Supplement: supp_bio.20149654_bio.20149654-s1.pdf [file supp_bio.20149654_bio.20149654-s1.pdf]

**Supplementary Material****Sakshi Puri and Zen Faulkes doi: 10.1242/bio.20149654**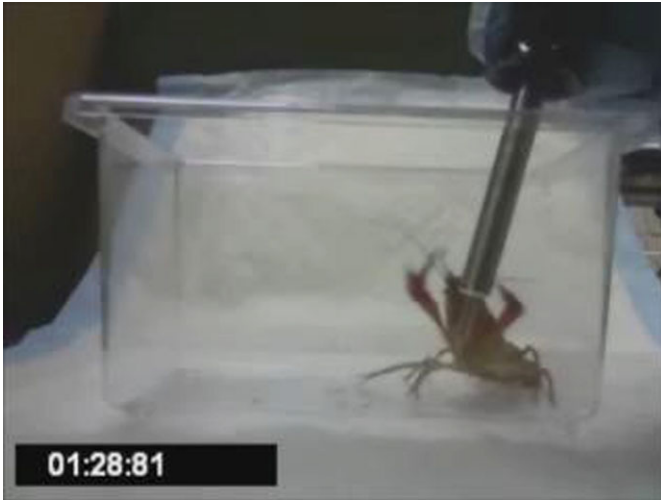

**Movie 1. Crayfish responses to noxious thermal stimuli.** Representative examples of responses of crayfish touched with object at room temperature, high temperature (soldering iron), or low temperature (dry ice).
